# Supplementary material for: Comparative effectiveness and durability of COVID‐19 vaccination against death and severe disease in an ongoing nationwide mass vaccination campaign
Source: PubMed Central journal article supplement (PMC9349766; doi:10.1002/jmv.27934), 2022-06-23

## Vaccine Effectiveness (any vaccine)

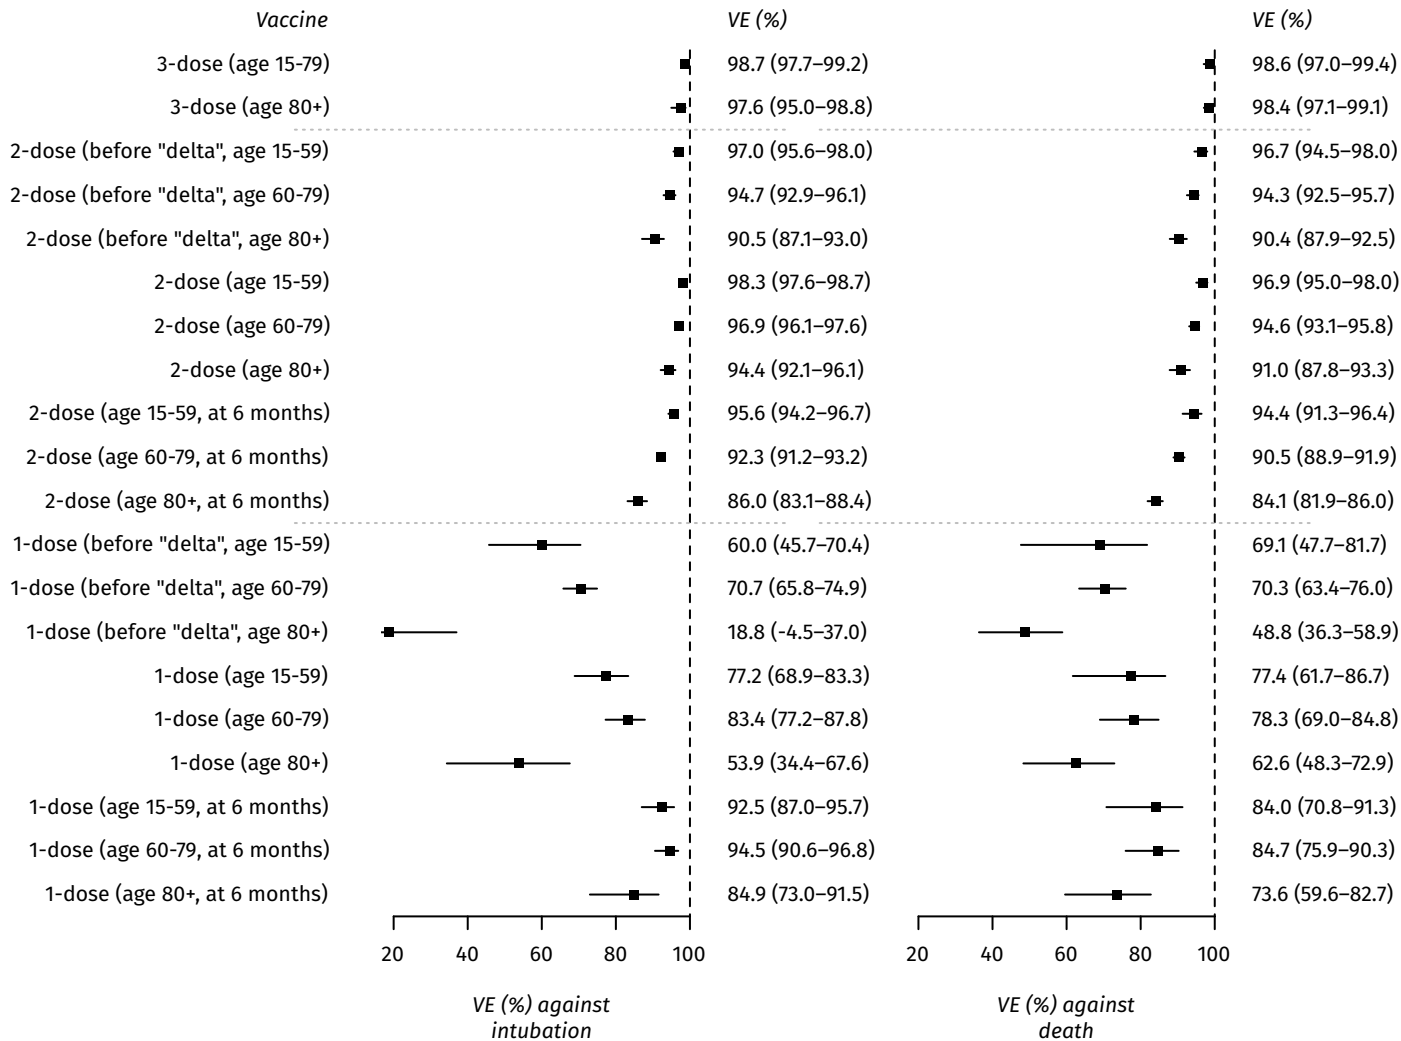

Supplement: JMV-94-5044-s001.pdf [file JMV-94-5044-s001.pdf]
